# Supplementary material for: Blood neurofilament light chain as a biomarker for monitoring and predicting paclitaxel-induced peripheral neuropathy in patients with gynecological cancers
Source: PubMed Central journal article supplement (PMC9428708; doi:10.3389/fonc.2022.942960), 2022-08-17

Supplementary figure 1. ROC curve analysis of the sNfL levels for predicting grade 3 PIPN.

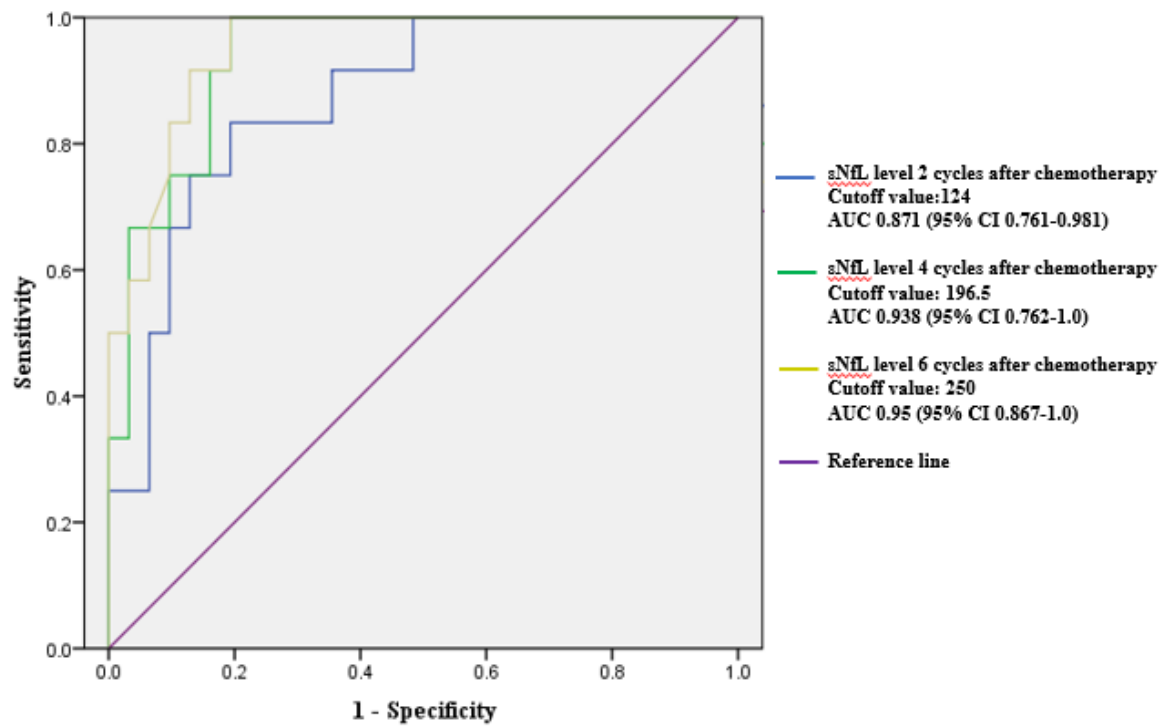

PIPn: paclitaxel-induced peripheral neuropathy, sNfL: serum neurofilament light chain, AUC: area under the receiver operating characteristic curve

# Supplementary figure 2. Platelet counts

Serial platelet counts during and six months after paclitaxel treatment in (A) the total study population and (B) grade-3 vs. grade 0–2 PIPN patients. Data are presented as (A) median (IQR) and (B) mean and standard error values.

PIPn: paclitaxel-induced peripheral neuropathy, PLT: platelets.

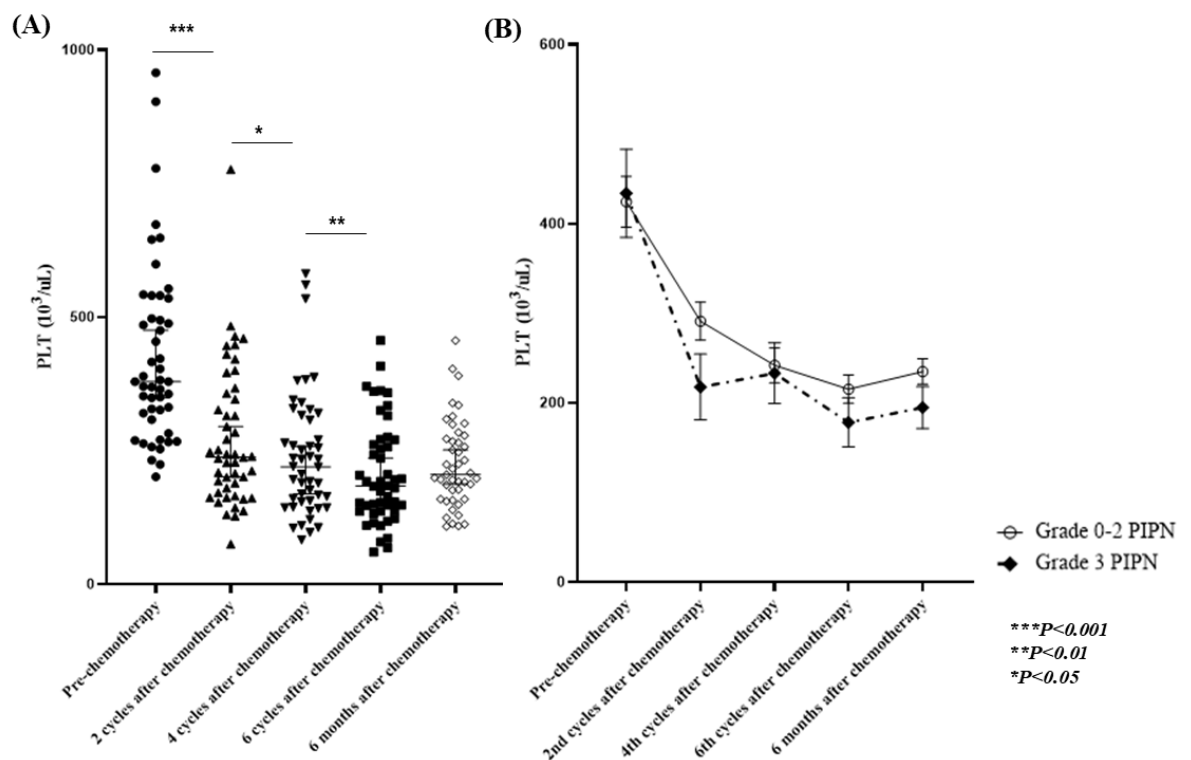

Supplement: DataSheet_1.pdf [file DataSheet_1.pdf]
