# Supplementary material for: Blood neurofilament light chain as a biomarker for monitoring and predicting paclitaxel-induced peripheral neuropathy in patients with gynecological cancers
Source: PubMed Central journal article supplement (PMC9428708; doi:10.3389/fonc.2022.942960), 2022-08-17
Supplement: Table_1.pdf [file Table_1.pdf]

Supplementary Table 1 Comparison of sNfL and sBDNF levels in grade 3 vs. grade 0-2 PIPN patients.

|                                           | Serum NfL level (pg/mL), mean (SE) |                            |                  | Serum BDNF level (pg/mL) (mean SE) |                            |              |
|-------------------------------------------|------------------------------------|----------------------------|------------------|------------------------------------|----------------------------|--------------|
|                                           | Patients with grade 0-2 PIPN       | Patients with grade 3 PIPN | p-value          | Patients with grade 0-2 PIPN       | Patients with grade 3 PIPN | p-value      |
| Pre-op                                    | 18.2 (2.1)                         | 20.3 (3.5)                 | 0.627            | 21268 (2254)                       | 20425 (3187)               | 0.833        |
| Pre-chemotherapy                          | 98.9 (12)                          | 65.3 (21.8)                | 0.2              | 19437 (1367)                       | 19912 (2267)               | 0.859        |
| 2 <sup>nd</sup> cycles after chemotherapy | 103.9 (19.4)                       | 225.8 (32.9)               | <b>0.004</b>     | 14757 (1046)                       | 11211 (1735)               | 0.087        |
| 4 <sup>th</sup> cycles after chemotherapy | 132.2 (22.6)                       | 324.1 (44.3)               | <b>0.001</b>     | 13418 (1150)                       | 10564 (1908)               | 0.207        |
| 6 <sup>th</sup> cycles after chemotherapy | 150.4 (35.8)                       | 506. (60.9)                | <b>&lt;0.001</b> | 10877 (950)                        | 6906(1576)                 | <b>0.037</b> |
| 6 months after chemotherapy               | 17.6 (1.2)                         | 23.5 (2)                   | <b>0.022</b>     | 17086 (1379)                       | 10920 (2144)               | <b>0.02</b>  |

P < 0.05 are shown in bold.

sNfL comparison has been adjusted for patient age.

sNfL: serum neurofilament light chain, sBDNF: serum brain-derived neurotrophic factor, PIPN: paclitaxel-induced peripheral neuropathy
